# Supplementary material for: Systemic corticosteroids in asthma: A call to action from World Allergy Organization and Respiratory Effectiveness Group
Source: PubMed Central journal article supplement (PMC9761384; doi:10.1016/j.waojou.2022.100726), 2022-12-10
Supplement: mmc1.pdf [file mmc1.pdf]

## Supplemental Appendix 1. Summary of key terminology

| <i>Term</i>                | <i>Definition</i>                                                                                                                                                                                                                                                                                                                      |
|----------------------------|----------------------------------------------------------------------------------------------------------------------------------------------------------------------------------------------------------------------------------------------------------------------------------------------------------------------------------------|
| <i>Short/acute courses</i> | 40–50 mg/day for 3–7 days                                                                                                                                                                                                                                                                                                              |
| <i>Long-term use</i>       | Dosing exceeding 7 days                                                                                                                                                                                                                                                                                                                |
| <i>Low dose</i>            | OCS: typically $\leq 7.5$ mg/day                                                                                                                                                                                                                                                                                                       |
|                            | The GINA report recommends that long-term, low-dose OCS is used as an add-on maintenance therapy in patients with uncontrolled severe asthma (defined as poor control despite optimal therapy with high-dose ICS) with or without LABA and other controllers, but only if contributing factors and side effects are taken into account |
| <i>High-dose ICS*</i>      | From 200 to >2000 mcg/day depending on which ICS is prescribed in adults                                                                                                                                                                                                                                                               |
|                            | <i>Total daily high-dose ICS examples according to GINA recommendations:</i>                                                                                                                                                                                                                                                           |
|                            | <ul style="list-style-type: none"> <li>• <i>Fluticasone furoate (DPI) 200 mcg/day</i></li> <li>• <i>Beclomethasone dipropionate (pMDI, standard particle, HFA) &gt;1000 mcg/day</i></li> </ul>                                                                                                                                         |

|                          |                                                                         |                                                                                                                                                                                                                                                                                                       |
|--------------------------|-------------------------------------------------------------------------|-------------------------------------------------------------------------------------------------------------------------------------------------------------------------------------------------------------------------------------------------------------------------------------------------------|
| <i>Medium-dose ICS*</i>  | From 100 to 1000 mcg/day depending on which ICS is prescribed in adults | <p><i>Total daily medium-dose ICS examples according to GINA recommendations:</i></p> <ul style="list-style-type: none"> <li>• <i>Fluticasone furoate (DPI) 100 mcg/day</i></li> <li>• <i>Beclomethasone dipropionate (pMDI, standard particle, HFA) &gt;500–1000 mcg/day</i></li> </ul>              |
| <i>Low-dose ICS*</i>     | From 80 to 5000 mcg/day depending on which ICS is prescribed in adults  | <p><i>Total daily low-dose ICS examples according to GINA recommendations:</i></p> <ul style="list-style-type: none"> <li>• <i>Ciclesonide (pMDI, extrafine particle, HFA) 80–160 mcg/day</i></li> <li>• <i>Beclomethasone dipropionate (pMDI, standard particle, HFA) 200–500 mcg/day</i></li> </ul> |
| <i>Cumulative use</i>    | OCS: ≥450 mg within a 90-day period (corresponding to ≥5 g/day)         |                                                                                                                                                                                                                                                                                                       |
| <i>Inappropriate use</i> | Courses of SCS that are not clinically justified                        |                                                                                                                                                                                                                                                                                                       |

\*Daily ICS doses are shown as metered doses. See product information for delivered doses

DPI, dry powder inhaler; GINA, Global Initiative for Asthma; HFA, hydrofluoroalkane propellant; ICS, inhaled corticosteroid(s); LABA, long-acting  $\beta_2$ -agonist(s); mcg, micrograms; OCS, oral corticosteroid(s); pMDI, pressurized metered dose inhaler; SCS, systemic corticosteroid(s)
