# Supplementary material for: Systemic corticosteroids in asthma: A call to action from World Allergy Organization and Respiratory Effectiveness Group
Source: PubMed Central journal article supplement (PMC9761384; doi:10.1016/j.waojou.2022.100726), 2022-12-10
Supplement: mmc2.pdf [file mmc2.pdf]

## Supplemental Appendix 2. SCS-associated AEs

| <i>Duration of exposure</i> | <i>AE</i>                                                                                                     |
|-----------------------------|---------------------------------------------------------------------------------------------------------------|
| <i>Acute</i>                | <b>Gastrointestinal:</b> peptic ulcers                                                                        |
|                             | <b>Infections:</b> pneumonia, sepsis, tuberculosis                                                            |
| <i>Chronic</i>              | <b>Metabolic:</b> diabetes mellitus type 2, obesity, dyslipidemia                                             |
|                             | <b>CV:</b> CV events, hypertension, hypercholesterolemia                                                      |
|                             | <b>Bone related:</b> osteoporosis, fracture                                                                   |
|                             | <b>Psychiatric and affective disorders:</b> anxiety, depression, psychosis, irritability, agitation, insomnia |
|                             | <b>Other:</b> glaucoma, cataracts, HPA axis suppression, herpes zoster, chronic kidney disease, sleep apnea   |

AE, adverse effect; CV, cardiovascular; HPA, hypothalamic-pituitary-adrenal; SCS, systemic corticosteroid(s)
